# Supplementary material for: Synthetic control arm from mixed clinical trials and real-world data from LYSA group for untreated diffuse large B cell lymphoma patients aged over 80 years: a bona fide strategy for innovative clinical trials
Source: Research Square preprint supplement (doi:10.21203/rs.3.rs-6822758/v1), 2025-06-16
Supplement: Supplementary file 1 [file 08d182a9826828fc1cb03e3a.xlsx]

## Sheet: Table III
	Before sIPTW weighting				After sIPTW weighting				Before sIPTW weighting				After sIPTW weighting
	SENIOR		REALYSA-SCA 1		SENIOR		REALYSA-SCA 1		SENIOR		REALYSA-SCA 2		SENIOR		REALYSA-SCA 2
	standard arm		N=97		standard arm		N=96		experimental arm		N=96		experimental arm		N=95
	N=96				N=96				N=102				N=101
Sex
MALE	42	(43.8%)	53	(54.6%)	47.2	(49.2%)	47.3	(49.1%)	45	(44.1%)	52	(54.2%)	51.2	(50.7%)	48.6	(51.2%)
FEMALE	54	(56.3%)	44	(45.4%)	48.7	(50.8%)	49.0	(50.9%)	57	(55.9%)	44	(45.8%)	49.8	(49.3%)	46.3	(48.8%)
Age at randomization (years)
Mean (SD)	84.0 (3.67)		84.1 (3.02)		84.2 (3.51)		84.1 (3.43)		83.8 (3.48)		84.1 (3.04)		83.9 (3.27)		84.0 (3.40)
Ann Arbor Stage
II	14	(14.6%)	9	(9.3%)	11.0	(11.4%)	11.0	(11.4%)	12	(11.8%)	9	(9.4%)	10.5	(10.4%)	10.4	(10.9%)
III-IV	82	(85.4%)	88	(90.7%)	85.0	(88.6%)	85.3	(88.6%)	90	(88.2%)	87	(90.6%)	90.5	(89.6%)	84.5	(89.1%)
Performance Status (ECOG)
0	18	(18.8%)	16	(16.7%)	17.2	(17.9%)	17.0	(17.8%)	28	(27.5%)	16	(16.8%)	23.4	(23.2%)	21.4	(22.8%)
1	52	(54.2%)	57	(59.4%)	54.4	(56.7%)	53.2	(55.7%)	51	(50.0%)	56	(58.9%)	54.5	(54.0%)	50.3	(53.5%)
2	26	(27.1%)	23	(24.0%)	24.4	(25.4%)	25.3	(26.5%)	23	(22.5%)	23	(24.2%)	23.0	(22.8%)	22.3	(23.7%)
Missing	0		1		0.0		0.8		0		1		0.0		0.9
Extra-nodal involvement >= 2
Yes	49	(51.0%)	55	(56.7%)	52.0	(54.2%)	52.4	(54.5%)	52	(51.0%)	54	(56.3%)	53.2	(52.7%)	51.6	(54.4%)
IPI in classes
2024-02-01	22	(22.9%)	19	(20.0%)	19.2	(20.0%)	19.8	(20.9%)	27	(27.3%)	19	(20.2%)	23.9	(24.4%)	21.8	(23.4%)
2024-05-03	74	(77.1%)	76	(80.0%)	76.8	(80.0%)	74.8	(79.1%)	72	(72.7%)	75	(79.8%)	74.3	(75.6%)	71.2	(76.6%)
Missing	0		2		0.0		1.6		3		2		2.7		1.9
B symptoms
Yes	29	(30.2%)	40	(41.2%)	35.5	(37.0%)	34.8	(36.1%)	21	(20.6%)	39	(40.6%)	29.3	(29.0%)	27.9	(29.4%)
LDH
> Upper limit	65	(67.7%)	64	(68.8%)	66.7	(69.5%)	64.5	(69.8%)	59	(59.6%)	63	(68.5%)	61.8	(62.9%)	59.9	(66.7%)
Missing	0		4		0.0		3.8		3		4		2.7		5.0
Mass > 10 cm
Yes	22	(22.9%)	13	(15.7%)	19.0	(19.8%)	17.4	(20.5%)	17	(16.7%)	13	(15.9%)	19.2	(19.0%)	16.2	(19.5%)
Missing	0		14		0.0		11.5		0		14		0.0		11.8
Albumin (g/L)
Mean (SD)	35.4 (6.56)		34.7 (6.38)		35.0 (6.50)		35.2 (6.51)		35.4 (6.47)		35.0 (6.17)		35.4 (6.13)		35.4 (6.12)
Missing	1		27		1		27		4		27		4		27
