# Supplementary material for: Synthetic control arm from mixed clinical trials and real-world data from LYSA group for untreated diffuse large B cell lymphoma patients aged over 80 years: a bona fide strategy for innovative clinical trials
Source: Research Square preprint supplement (doi:10.21203/rs.3.rs-6822758/v1), 2025-06-16
Supplement: Supplementary file 2 [file 0cec1bbffae1fd8f7a89090a.xlsx]

## Sheet: Table II
	Before sIPTW weighting				After sIPTW weighting				Before sIPTW weighting				After sIPTW weighting
	SENIOR		Mixed-SCA 1		SENIOR		Mixed-SCA 1		SENIOR		Mixed-SCA 2		SENIOR		Mixed-SCA 2
	standard arm		N=170		standard arm		N=171		experimental arm		N=168		experimental arm		N=169
	N=96				N=95				N=103				N=102
Sex
MALE	42	(43.8%)	87	(51.2%)	45.7	(47.9%)	81.2	(47.4%)	45	(43.7%)	86	(51.2%)	50.0	(49.2%)	82.7	(48.8%)
FEMALE	54	(56.3%)	83	(48.8%)	49.7	(52.1%)	90.1	(52.6%)	58	(56.3%)	82	(48.8%)	51.6	(50.8%)	86.8	(51.2%)
Age at randomization (years)
Mean (SD)	84.0 (3.67)		83.9 (3.04)		84.0 (3.32)		84.2 (3.61)		83.7 (3.48)		83.9 (3.05)		83.9 (3.29)		84.0 (3.57)
Ann Arbor Stage
II	14	(14.6%)	18	(10.6%)	11.8	(12.4%)	20.4	(11.9%)	12	(11.7%)	18	(10.7%)	11.2	(11.0%)	18.1	(10.7%)
III-IV	82	(85.4%)	152	(89.4%)	83.6	(87.6%)	150.9	(88.1%)	91	(88.3%)	150	(89.3%)	90.4	(89.0%)	151.3	(89.3%)
Performance Status (ECOG)
0	18	(18.8%)	39	(23.1%)	19.7	(20.6%)	36.1	(21.2%)	28	(27.2%)	39	(23.4%)	25.8	(25.4%)	40.1	(23.8%)
1	52	(54.2%)	92	(54.4%)	53.0	(55.6%)	91.6	(53.7%)	52	(50.5%)	91	(54.5%)	52.7	(51.9%)	86.5	(51.3%)
2	26	(27.1%)	38	(22.5%)	22.7	(23.8%)	42.8	(25.1%)	23	(22.3%)	37	(22.2%)	23.1	(22.7%)	42.1	(24.9%)
Missing	0		1		0.0		0.8		0		1		0.0		0.8
Extra-nodal involvement >= 2
Yes	49	(51.0%)	85	(50.0%)	47.1	(49.4%)	87.1	(50.9%)	53	(51.5%)	84	(50.0%)	53.3	(52.5%)	87.3	(51.5%)
IPI in classes
1-2	22	(22.9%)	34	(20.2%)	19.7	(20.7%)	35.1	(20.7%)	27	(27.0%)	34	(20.5%)
3-5	74	(77.1%)	134	(79.8%)	75.6	(79.3%)	134.5	(79.3%)	73	(73.0%)	132	(79.5%)	76.2	(77.3%)	131.9	(78.7%)
Missing	0		2		0.0		1.7		3		2		3.1		1.9
B symptoms
Yes	29	(30.2%)	53	(31.2%)	29.4	(30.9%)	50.9	(29.7%)	21	(20.4%)	51	(30.4%)	25.5	(25.1%)	43.0	(25.4%)
LDH
> Upper limit	65	(67.7%)	111	(66.9%)	65.6	(68.8%)	114.6	(68.5%)	60	(60.0%)	109	(66.5%)	63.5	(64.5%)	109.2	(66.3%)
Missing	0		4		0.0		3.9		3		4		3.1		4.7
Mass > 10 cm
Yes	22	(22.9%)	18	(11.5%)	15.1	(15.8%)	27.4	(17.3%)	17	(16.5%)	18	(11.7%)	16.1	(15.8%)	24.8	(15.8%)
Missing	0		14		0.0		12.3		0		14		0.0		12.6
Albumin (g/L)
Mean (SD)	35.4 (6.5639)		35.3 (6.0477)		35.3 (6.3026)		35.3 (6.2173)		35.6 (6.6928)		35.5 (5.8327)		35.7 (5.9928)		35.2 (6.0126)
Missing	1		32		1		32		4		32		4		32
