# Supplementary material for: Synthetic control arm from mixed clinical trials and real-world data from LYSA group for untreated diffuse large B cell lymphoma patients aged over 80 years: a bona fide strategy for innovative clinical trials
Source: Research Square preprint supplement (doi:10.21203/rs.3.rs-6822758/v1), 2025-06-16
Supplement: Supplementary file 3 [file 5c36ab4bbb9c366f32f7dfe8.xlsx]

## Sheet: Supplemental Table I
Method for handling missing data	Arms	Before weighting	sIPTW
		HR[95%CI]	HR[95%CI]
“Across”	SENIOR Std vs. Mixed SCA 1	0.86 [0.57-1.32]	0.79 [0.52-1.20]
	SENIOR Exp vs. Mixed SCA 2	0.83 [0.55-1.25]	0.74 [0.50-1.12]
	SENIOR Sts vs. REALYSA SCA 1	0.89 [0.56-1.44]	0.90 [0.56-1.43]
	SENIOR Exp vs. REALYSA SCA 2	0.84 [0.53-1.35]	0.88 [0.55-1.41]
“Complete case”	SENIOR Std vs. Mixed SCA 1	0.87 [0.56-1.36]	0.78 [0.50-1.23]
	SENIOR Exp vs. Mixed SCA 2	0.81 [0.52-1.27]	0.75 [0.48-1.17]
	SENIOR Sts vs. REALYSA SCA 1	0.97 [0.56-1.68]	0.94 [0.55-1.60]
	SENIOR Exp vs. REALYSA SCA 2	0.82 [0.47-1.44]	0.96 [0.55-1.67]
“Within”	SENIOR Std vs. Mixed SCA 1	Not performed	0.82 [0.54-1.24]
	SENIOR Exp vs. Mixed SCA 2	Not performed	0.84 [0.56-1.27]
	SENIOR Sts vs. REALYSA SCA 1	Not performed	0.91 [0.56-1.46]
	SENIOR Exp vs. REALYSA SCA 2	Not performed	0.95 [0.59-1.53]
