# Supplementary material for: Synthetic control arm from mixed clinical trials and real-world data from LYSA group for untreated diffuse large B cell lymphoma patients aged over 80 years: a bona fide strategy for innovative clinical trials
Source: Research Square preprint supplement (doi:10.21203/rs.3.rs-6822758/v1), 2025-06-16
Supplement: Supplementary file 4 [file d9bd874e93b29c804b2bb44f.xlsx]

## Sheet: Table I
	Population
	SENIOR		SENIOR		LNH09-7B		REALYSA
	experimental arm		standard arm
	N=104		N=98		N=73		N=97
Sex
MALE	45	(43.3%)	44	(44.9%)	34	(46.6%)	53	(54.6%)
FEMALE	59	(56.7%)	54	(55.1%)	39	(53.4%)	44	(45.4%)
Age at randomization (years)
Mean (SD)	83.7 (3.48)		84.2 (3.72)		83.7 (3.06)		84.1 (3.02)
<=85	80	(76.9%)	70	(71.4%)	51	(69.9%)	70	(72.2%)
>85	24	(23.1%)	28	(28.6%)	22	(30.1%)	27	(27.8%)
Ann Arbor Stage
2	12	(11.5%)	15	(15.3%)	9	(12.3%)	9	(9.3%)
3	15	(14.4%)	12	(12.2%)	16	(21.9%)	15	(15.5%)
4	77	(74.0%)	71	(72.4%)	48	(65.8%)	73	(75.3%)
Performance Status (ECOG)
0	28	(26.9%)	18	(18.4%)	23	(31.5%)	16	(16.7%)
1	53	(51.0%)	54	(55.1%)	35	(47.9%)	57	(59.4%)
2	23	(22.1%)	26	(26.5%)	15	(20.5%)	23	(24.0%)
Missing	0		0		0		1
Extra-nodal involvement >= 2
Yes	54	(51.9%)	50	(51.0%)	30	(41.1%)	55	(56.7%)
IPI in classes
1-2	27	(26.7%)	23	(23.5%)	15	(20.5%)	19	(20.0%)
3-5	74	(73.3%)	75	(76.5%)	58	(79.5%)	76	(80.0%)
Missing	3		0		0		2
B symptoms
Yes	22	(21.2%)	29	(29.6%)	13	(17.8%)	40	(41.2%)
LDH
> Upper limit	61	(60.4%)	66	(67.3%)	47	(64.4%)	64	(68.8%)
Missing	3		0		0		4
Mass > 10 cm
Yes	17	(16.3%)	22	(22.4%)	5	(6.8%)	13	(15.7%)
Missing	0		0		0		14
Diagnosis (classification)
HGBL	3	(2.9%)	1	(1.0%)	0	(0.0%)	16	(16.5%)
DLBCL	101	(97.1%)	97	(99.0%)	73	(100.0%)	81	(83.5%)
Albumin (g/L)
Mean (SD)	35.8 (7.02)		35.9 (7.46)		35.9 (5.66)		34.7 (6.39)
Missing	4		1		5		27
